# Supplementary material
Source: MDPI journal article supplement (https://www.mdpi.com/2073-4441/7/7/3367)
Supplement: s1 [file s1]

## Supplementary Material

As shown in Table S1, the hydraulic conductivity values in the macro areas differ chiefly for the Materials 1 and 2, which are also the most abundant in the study area. The coefficient of variation (CV), defined as the ratio of the standard deviation to the mean for each estimated parameters, is indicative of the sensitivity of the model to the parameters and low values are indicative of highly sensitive parameters. In general, the materials belonging to the coarse macro area (Zone C) are characterized by lower CVs. The lateral inflows and outflows, reported in Table S2, show a significant contribution from the lateral aquifers into the Adige Valley aquifer. The most relevant contribution comes from the Fersina alluvial fan, while the Trento slope is the smallest. Values of CV ranges from 0.28 (Fersina alluvial fan) to 3.99 (upward aquifer). The positions of these portions of the domain boundaries are shown in Figure 1B.

Streambed conductance varies along the Adige River (Table S3) with lower values inferred at the following two reaches: 3 to 13 km and 26 to 30 km. This abrupt decrease in the river conductance values occurs in correspondence with reclaimed and almost impervious areas. Hence, we attribute the lower leakage coefficients to the impervious river banks along these two portions of the river. Notice that, impervious river banks are present also along the Noce River, in the area in which it crosses the Nave San Rocco Ditches, and also in these areas the river conductance is particularly small.

**Table S1.** Statistics of the estimated values of hydraulic conductivity for the four different materials in the three different zones.

| HydCond (m/d)     | Range of Variability in the PSO |             | Mean of the<br>Estimated Values | Coefficient of<br>Variation |
|-------------------|---------------------------------|-------------|---------------------------------|-----------------------------|
|                   | Lower Bound                     | Upper Bound |                                 |                             |
| MATERIAL 1 ZONE C | 200                             | 3000        | 1886.42                         | 0.42                        |
| MATERIAL 2 ZONE C | 100                             | 1000        | 948.71                          | 0.08                        |
| MATERIAL 3 ZONE C | 10                              | 200         | 186.77                          | 0.11                        |
| MATERIAL 4 ZONE C | 0.1                             | 10          | 8.77                            | 0.2                         |
| MATERIAL 1 ZONE M | 200                             | 3000        | 2016.34                         | 0.52                        |
| MATERIAL 2 ZONE M | 100                             | 1000        | 602.19                          | 0.65                        |
| MATERIAL 3 ZONE M | 10                              | 200         | 145.46                          | 0.44                        |
| MATERIAL 4 ZONE M | 0.1                             | 10          | 8.29                            | 0.3                         |
| MATERIAL 1 ZONE F | 200                             | 3000        | 1328.07                         | 0.89                        |
| MATERIAL 2 ZONE F | 100                             | 1000        | 521.14                          | 0.71                        |
| MATERIAL 3 ZONE F | 10                              | 200         | 143.52                          | 0.46                        |
| MATERIAL 4 ZONE F | 0.1                             | 10          | 7.73                            | 0.39                        |

**Table S2.** Statistics of the estimated values of lateral inflows and outflows. The position and extension of these boundaries are depicted in the Figure 1B.

| Lateral Inflows and Outflows (m <sup>3</sup> /d) | Range of Variability in the PSO |             | Mean of the Estimated Values | Coefficient of Variation |
|--------------------------------------------------|---------------------------------|-------------|------------------------------|--------------------------|
|                                                  | Lower Bound                     | Upper Bound |                              |                          |
| Lavis Alluvial Fan                               | 50,000                          | 150,000     | 75,309.96                    | 0.34                     |
| Downward aquifer                                 | −100,000.0                      | −10,000     | −37,310.78                   | 0.71                     |
| Fersina Alluvial Fan                             | 10,000.0                        | 100,000     | 80,518.20                    | 0.28                     |
| Mezzocorona Slope                                | 10,000.0                        | 100,000     | 63,001.67                    | 0.58                     |
| Gardolo Slope                                    | 10,000.0                        | 100,000     | 67,200.55                    | 0.43                     |
| Noce Alluvial Fan                                | 10,000.0                        | 100,000     | 59,720.48                    | 0.53                     |
| Mezzolombardo Slope                              | 1,000.0                         | 100,000     | 39,372.27                    | 0.67                     |
| San Michele Slope                                | 10,000.0                        | 100,000     | 77,473.99                    | 0.36                     |
| Spini Slope                                      | 1000.0                          | 80,000      | 33,439.07                    | 0.96                     |
| Trento Slope                                     | 0.0                             | 50,000      | 2,045.26                     | 3.99                     |
| Upward Aquifer                                   | 1000                            | 50,000      | 5,949.24                     | 1.01                     |

**Table S3.** Statistics of the estimated values of river conductance.

| River Conductance (m <sup>2</sup> /d) | Range of Variability in the PSO |             | Mean of the Estimated Values | Coefficient of Variation |
|---------------------------------------|---------------------------------|-------------|------------------------------|--------------------------|
|                                       | Lower Bound                     | Upper Bound |                              |                          |
| Adige R. 0–3 km                       | 1.0                             | 500         | 475.03                       | 0.06                     |
| Adige R. 3–13 km                      | 0.01                            | 500         | 27.2                         | 3.71                     |
| Adige R. 13–26 km                     | 1.0                             | 500         | 439.27                       | 0.16                     |
| Adige R. 26–30 km                     | 1.0                             | 500         | 218.27                       | 1.05                     |
| Noce R.                               | 0.008                           | 10          | 2.75                         | 1.28                     |
| Avisio R.                             | 0.01                            | 100         | 57.27                        | 0.58                     |
| Fersina R.                            | 1.0                             | 500         | 109.01                       | 1.21                     |
| Ditches                               | 1.0                             | 100         | 56.63                        | 0.49                     |
